# Supplementary material for: Inhibition of ATM Increases the Radiosensitivity of Uveal Melanoma Cells to Photons and Protons
Source: MDPI journal article supplement (doi:10.3390/cancers12061388), 2020-05-28
Supplement: s1 [file s1]

# Inhibition of ATM Increases the Radiosensitivity of Uveal Melanoma Cells to Photons and Protons

Rumana N. Hussain, Sarah E. Coupland, Jakub Khzouz, Helen Kalirai and Jason L. Parsons

**Table S1.** ATM staining (% positive tumor cells) in proton-irradiated and primary enucleation UM samples.

|     | Proton-irradiated ( <i>n</i> = 32) | Non-irradiated ( <i>n</i> = 20) | Statistical Analysis |
|-----|------------------------------------|---------------------------------|----------------------|
| ATM | 29.69%                             | 31.25%                          | <i>p</i> = 0.911     |

**Table S2.** ATM staining (% positive tumor cells) in proton-irradiated UM samples and association with tumor recurrence.

|     | Tumor Recurrence/Growth ( <i>n</i> = 18) | Neovascular Complications ( <i>n</i> = 14) | Statistical Analysis |
|-----|------------------------------------------|--------------------------------------------|----------------------|
| ATM | 32.78%                                   | 25.71%                                     | <i>p</i> = 0.326     |

**Table S3.** Correlative analysis of ATM staining (% positive tumor cells) and high-risk UM tumor characteristics.

|                          |                         | ATM Staining (%)<br>( <i>n</i> =20) | Statistical Analysis |
|--------------------------|-------------------------|-------------------------------------|----------------------|
| Chromosome 3 status      | Disomy 3                | 27.14                               | <i>p</i> = 0.516     |
|                          | Monosomy 3              | 35.00                               |                      |
| Cause of enucleation     | Radiation complications | 25.71                               | <i>p</i> = 0.498     |
|                          | Tumor related           | 32.78                               |                      |
| Ciliary body structure   | No                      | 27.33                               | <i>p</i> = 0.670     |
|                          | Yes                     | 31.76                               |                      |
| Tumor size               | Small (<15 mm)          | 30.00                               | <i>p</i> = 0.917     |
|                          | Large (>15 mm)          | 28.75                               |                      |
| Lymphocytic infiltration | No                      | 80.00                               | <i>p</i> = 0.740     |
|                          | Yes                     | 28.06                               |                      |
| Macrophages              | Yes                     | All                                 | <i>p</i> = 0.909     |
| Plasma cells             | No                      | 29.17                               |                      |
|                          | Yes                     | 30.36                               | <i>p</i> = 0.625     |
| Mitotic count            |                         |                                     |                      |
| Time to enucleation      |                         |                                     | <i>p</i> = 0.719     |

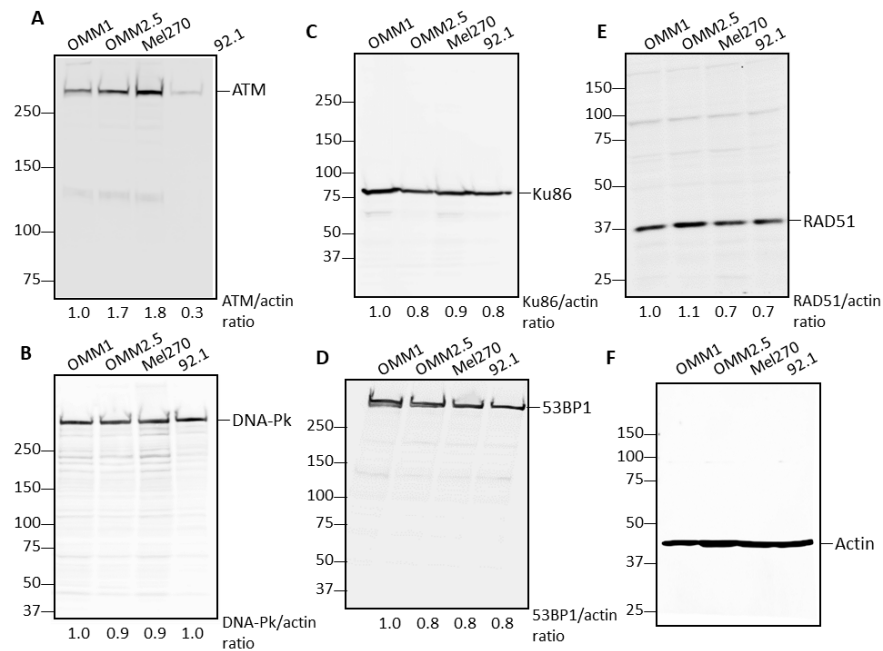

**Figure S1.** Expression of DSB repair proteins in UM cell lines. Whole cell extracts from UM cell lines were prepared and analysed by immunoblotting with either (A) ATM or (B) DNA-Pk, (C) Ku86, (D) 53BP1, (E) RAD51 or (F) actin antibodies. Representative images are shown, along with the relative protein ratio to actin, normalised to those in the OMM1 cells which was set to 1.0.

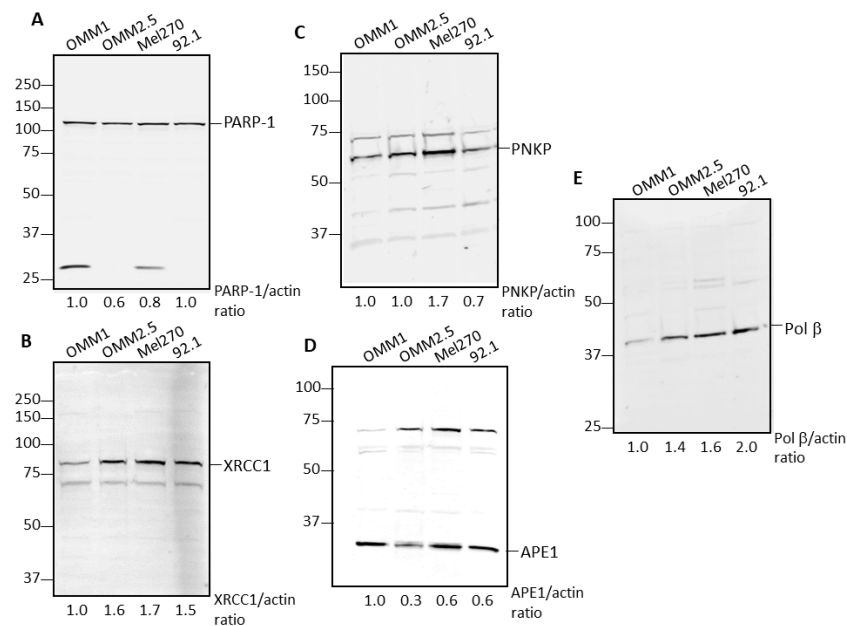

**Figure S2.** Expression of BER and SSB repair proteins in UM cell lines. Whole cell extracts from UM cell lines were prepared and analysed by immunoblotting with either (A) PARP-1, (B) XRCC1, (C) PNKP, (D) APE1 or (E) Pol β antibodies. Representative images are shown, along with the relative protein ratio to actin, normalised to those in the OMM1 cells which was set to 1.0.

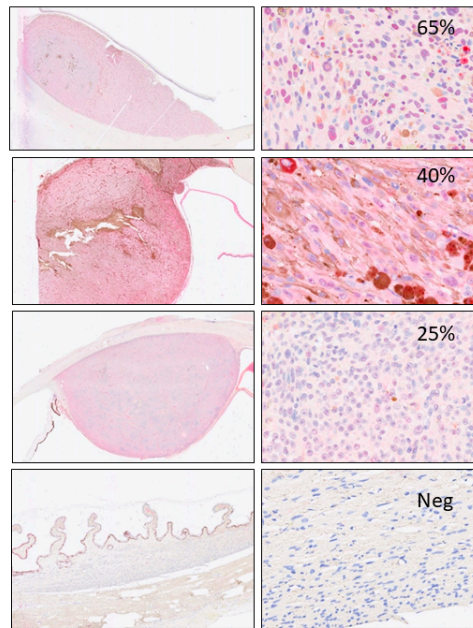

**Figure S3.** Variability in the staining of ATM observed in cells from UM tissues. Immunohistochemical staining using ATM antibodies and detection was performed, along with counter-staining using Mayer's hematoxylin. Stained cells were evaluated using both a x10 (left panels) and a x40 objective (right panels), and shown are examples of tissues evaluated as either negative staining for ATM (Neg), or with increased staining (25–40%) ATM staining.

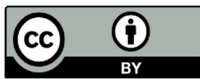

© 2020 by the authors. Licensee MDPI, Basel, Switzerland. This article is an open access article distributed under the terms and conditions of the Creative Commons Attribution (CC BY) license (<http://creativecommons.org/licenses/by/4.0/>).
